# Supplementary material for: Integrating GWAS and Transcriptomics to Identify the Molecular Underpinnings of Thermal Stress Responses in Drosophila melanogaster
Source: Front Genet. 2020 Jun 23;11:658. doi: 10.3389/fgene.2020.00658 (PMC7324644; doi:10.3389/fgene.2020.00658)
Supplement: Supplementary file 1 [file Table_1.xlsx]

## Sheet: Sheet1
Supplementary Table 1. Averages per sex for CTmin and CTmax for 100 DGRP lines.
	DGRP line	CTmin		CTmax
		Males	Females	Males	Females
	208	5.04	4.68	40.61	40.59
	313	5.38	5.18	39.97	39.62
	639	6.04	7.93	39.38	38.9
	712	5.65	6.24	40.38	40.35
	786	4.73	5.07	40.51	40.02
	303	5.69	5.22	40.33	39.72
	380	5.31	5.6	40.24	40.03
	399	4.12	3.49	40.44	40.5
	486	6.98	5.75	40.39	40.09
	358	4.76	5.59	40.05	40.55
	375	7.19	7.22	40.18	39.86
	379	4.63	4.86	39.89	39.69
	437	5.76	5.88	39.37	39.84
	517	5.51	6.74	39.23	39.18
	555	5.5	5.8	40.24	40.12
	707	6.78	6.25	40.24	39.92
	732	7.43	5.72	39.89	39.77
	765	5.93	5.7	39.96	39.11
	365	4.26	4.33	40.25	40.1
	714	8.55	8.64	39.72	39.74
	301	5.47	6.92	38.71	40.51
	304	2.4	3.04	40.12	38.76
	307	6.81	7.25	39.49	40.14
	315	5.29	4.93	39.49	40.29
	324	5.4	4.08	40.11	40.26
	357	6.36	7.03	39.75	39.5
	360	5.42	5.58	40.32	38.64
	362	4.7	5.21	40.28	40.28
	391	5.6	5.85	39.94	40.23
	730	4.08	4.19	39.67	39.53
	799	6.43	6.35	39.68	39.26
	820	5.41	3.47	39.52	39.44
	859	3.95	4.5	40.41	40.08
	705	4.27	4.94	39.55	39.73
	395	4.74	4.6	39.74	39.82
	397	5.07	5.02	40.51	40.2
	530	5.56	5.89	39.27	39.07
	306	4.73	5.82	39.56	39.91
	355	5.18	4.74	39.23	38.51
	513	3.69	3.67	40.1	40.2
	31	4.07	4.62	40.36	40.11
	409	5.38	4.35	39.63	38.8
	855	3.38	4.11	40.05	39.61
	843	4.41	3.95	39.39	40.03
	235	4.47	4.55	39.82	39.86
	310	3.53	3.84	40.12	40.04
	810	6.45	6.63	40.2	40.04
	805	5.01	4.66	39.61	39.98
	808	3.13	3.12	38.63	38.84
	88	4.97	4.3	40.21	40.55
	73	3.62	3.91	39.73	40.05
	91	4.92	4.69	39.78	39.6
	93	4.99	5.58	39.89	39.03
	41	3.15	2.88	39.48	39.14
	913	4.52	4.46	40.72	40.56
	85	5.31	5.85	39.68	39.68
	852	4.52	4.19	40.01	40.35
	774	5.39	6.14	40.09	40.02
	879	3.8	3.98	40.35	39.77
	857	4.25	3.44	40.12	40.14
	822	4.7	4	39.03	39.81
	837	5.59	4.83	40.1	39.69
	100	2.82	2.29	40.19	39.93
	195	3.07	4.69	39.55	39.76
	136	3.98	4.81	39.92	39.94
	129	3.54	3.08	39.23	38.8
	38	5.9	5.59	40.01	39.61
	75	4.31	3.77	39.53	39.92
	348	2.56	2.4	39.65	39.95
	908	4.91	5.35	39.59	39.74
	596	4.1	4.81	40.04	39.65
	45	3.73	4.06	39.74	40.05
	319	2.91	2.94	39.65	39.32
	861	5.21	5.49	40.15	40.33
	427	4.86	5.55	39.7	39.18
	161	5.97	6.69	39.42	39.07
	59	6.2	6.82	40.01	39.72
	239	5.05	5.28	40.31	39.84
	228	3.1	3.33	39.27	39.42
	385	4.58	4.81	39.17	38.91
	352	4.69	4.8	40.21	39.82
	350	2.17	2.68	39.29	39.8
	461	0.81	2.8	40.57	40.45
	492	6.35	7.06	40.07	40.08
	386	6.31	6.38	40.41	40.17
	783	5.9	5.76	39.86	40.15
	491	5.25	5.55	39.77	39.87
	382	4.21	4.84	39.84	39.65
	309	5.6	5.03	39.69	39.77
	317	3.81	4.45	39.98	39.9
	181	5.27	4.22	39.57	39.76
	189	5.17	4.75	39.55	39.77
	359	3.59	4.41	39.62	39.31
	737	5.3	5.58	40.26	40.8
	440	7.73	6.77	40.64	40.27
	441	3.24	3.81	40.31	40.33
	796	2.88	2.81	39.92	39.76
	703	4.95	3.77	39.49	39.48
	371	4.41	3.93	39.6	39.42
	716	5.25	5.16	39.87	39.29
